# Supplementary material for: The protective mechanism ofLactobacillus plantarumFZU3013 against non-alcoholic fatty liver associated with hyperlipidemia in mice fed a high-fat diet
Source: Royal Society of Chemistry journal article supplement (doi:10.1039/c9fo03003d), 2020-01-01
Supplement: c9fo03003d1.pdf [file c9fo03003d1.pdf]

## Supplementary materials

**Table S1**

Dietary energy distribution of the normal-fat diet (NFD, #D12450B) and high-fat diet (HFD, #D12451) purchased from Research Diets Co. Ltd. (New Brunswick, NJ, USA).

| <b>Nutritional Components</b> | <b>Normal-fat diet (10% dietary fat)</b> | <b>High-fat diet (45% dietary fat)</b> |
|-------------------------------|------------------------------------------|----------------------------------------|
| Protein                       | 20                                       | 20                                     |
| Carbohydrate                  | 70                                       | 35                                     |
| Fat                           | 10                                       | 45                                     |
| Total kcal/g                  | 100                                      | 100                                    |

**Table S2**

Composition of the normal-fat diet (NFD, #D12450B) and high-fat diet (HFD, #D12451) used in the animal experiment.

| <b>Ingredients</b>  | <b>Normal-fat diet (10% dietary fat)</b> |             | <b>High-fat diet (45% dietary fat)</b> |             |
|---------------------|------------------------------------------|-------------|----------------------------------------|-------------|
|                     | <b>g</b>                                 | <b>kcal</b> | <b>g</b>                               | <b>kcal</b> |
| Casein, 30 mesh     | 200                                      | 800         | 200                                    | 800         |
| L-cystine           | 3                                        | 12          | 3                                      | 12          |
| Corn starch         | 315                                      | 1260        | 72.8                                   | 291         |
| Maltodextrin 10     | 35                                       | 140         | 100                                    | 400         |
| Aucose              | 350                                      | 1400        | 172.8                                  | 691         |
| Cellulose, BW200    | 50                                       | 0           | 50                                     | 0           |
| Soybean oil         | 25                                       | 225         | 25                                     | 225         |
| Lard                | 20                                       | 180         | 177.5                                  | 1598        |
| Mineral mix S10026  | 10                                       | 0           | 10                                     | 0           |
| Dicalcium phosphate | 13                                       | 0           | 13                                     | 0           |
| Calcium carbonate   | 5.5                                      | 0           | 5.5                                    | 0           |
| Potassium citrate   | 16.5                                     | 0           | 16.5                                   | 0           |
| Vitamin mix V10001  | 10                                       | 40          | 10                                     | 40          |
| Choline bitartrate  | 2                                        | 0           | 2                                      | 0           |
| FD&C yellow dye     | 0.05                                     | 0           | -                                      | -           |
| FD&C red dye        | -                                        | -           | 0.05                                   | 0           |
